# Supplementary material for: Synthesis of dual functional pyrimidinium ionic liquids as reaction media and antimicrobial agents
Source: Royal Society of Chemistry journal article supplement (doi:10.1039/c6ra21865b), 2016-01-01
Supplement: c6ra21865b1.pdf [file c6ra21865b1.pdf]

## Supporting Information

### Synthesis of Dual Functional Pyrimidinium Ionic Liquids as Reaction Media and Antimicrobial Agents

Kamna Goel, Smritilekha Bera, Man Singh, and Dhananjoy Mondal\*

*School of Chemical Sciences, Central University of Gujarat, Gandhinagar-382030, India*

[dhananjoym@yahoo.com](mailto:dhananjoym@yahoo.com)

#### Table of contents

|                                                                                   |         |
|-----------------------------------------------------------------------------------|---------|
| 1. <sup>1</sup> H and <sup>13</sup> C NMR spectra of pyrimidine                   |         |
| <b>1a</b> .....                                                                   | S2      |
| 2. <sup>1</sup> H and <sup>13</sup> C NMR spectra of compounds <b>2a-2j</b> ..... | S3-S12  |
| 3. <sup>1</sup> H and <sup>13</sup> C NMR spectra of compounds <b>3a-3j</b> ..... | S13-S22 |
| 4. <sup>1</sup> H and <sup>13</sup> C NMR spectra of compounds <b>4a-4j</b> ..... | S23-S32 |
| 5. <sup>1</sup> H NMR spectrum of compounds <b>5</b> and <b>7</b> .....           | S33     |
| 6. DSC data of five ILs.....                                                      | S34     |
| 7. Thermal properties of pyrimidinium ionic liquids.....                          | S35     |

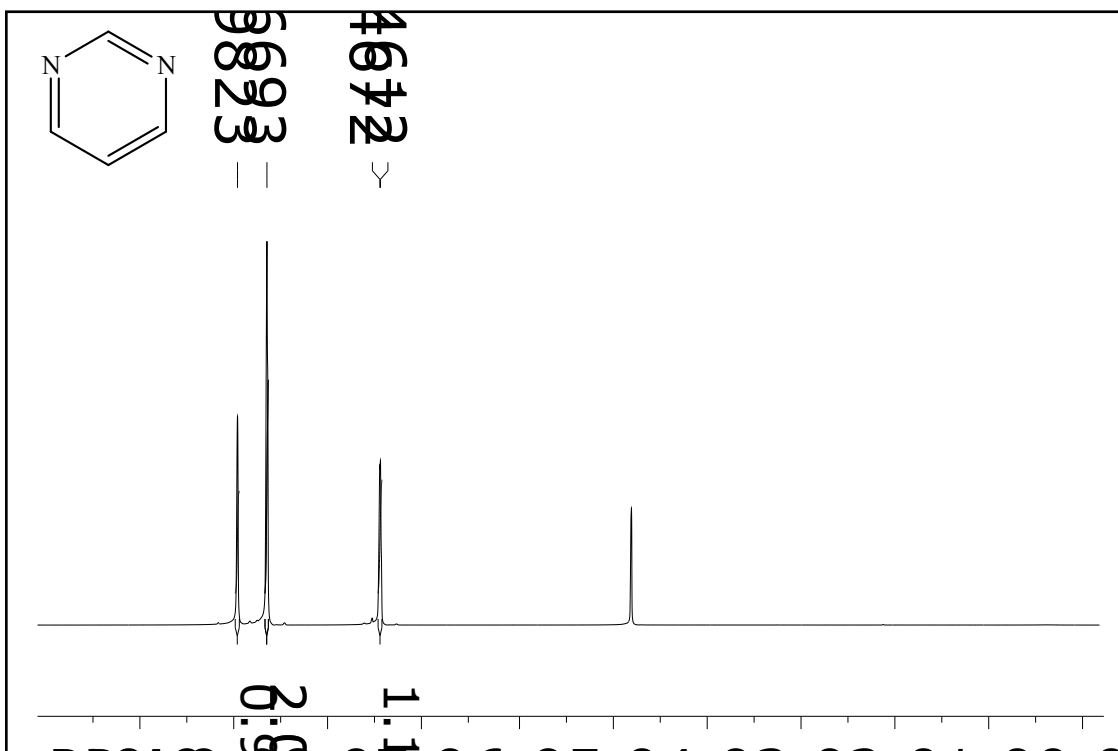

$^1\text{H}$  NMR spectrum of pyrimidine (**1a**) in  $\text{D}_2\text{O}$  at 500 MHz

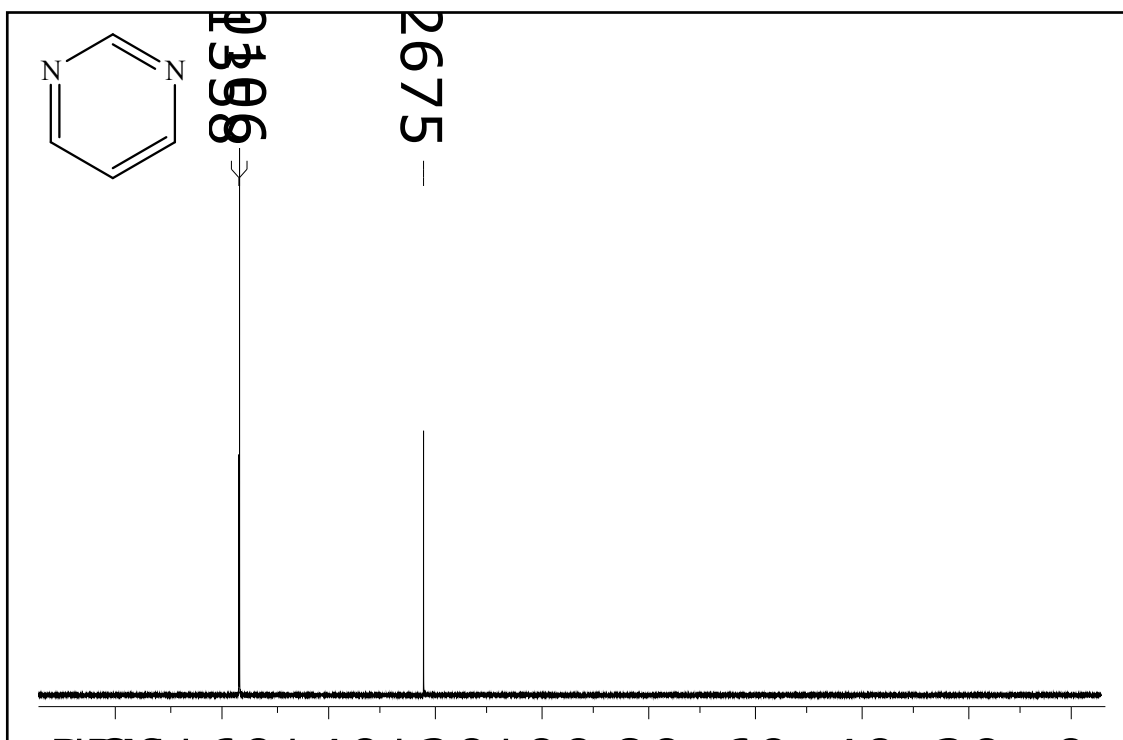

$^{13}\text{C}$  NMR spectrum of pyrimidine (**1a**) in  $\text{D}_2\text{O}$  at 500 MHz

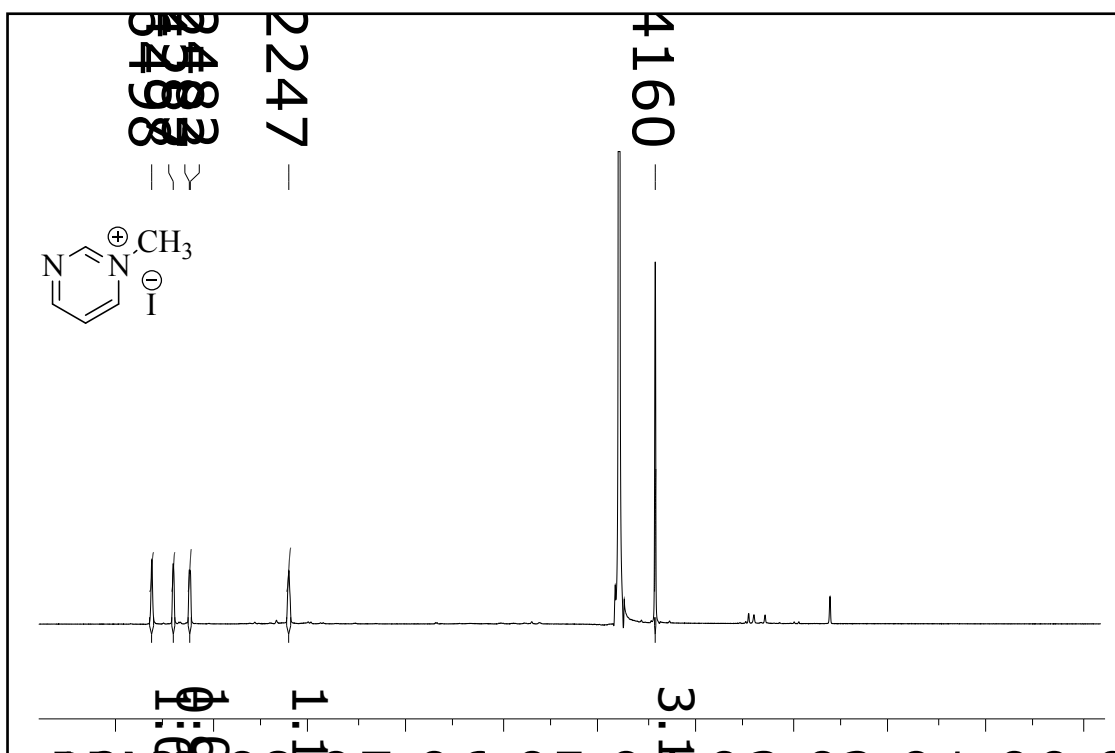

$^1\text{H}$  NMR spectrum of 1-methylpyrimidin-1-ium iodide (**2a**) in  $\text{D}_2\text{O}$  at 500 MHz

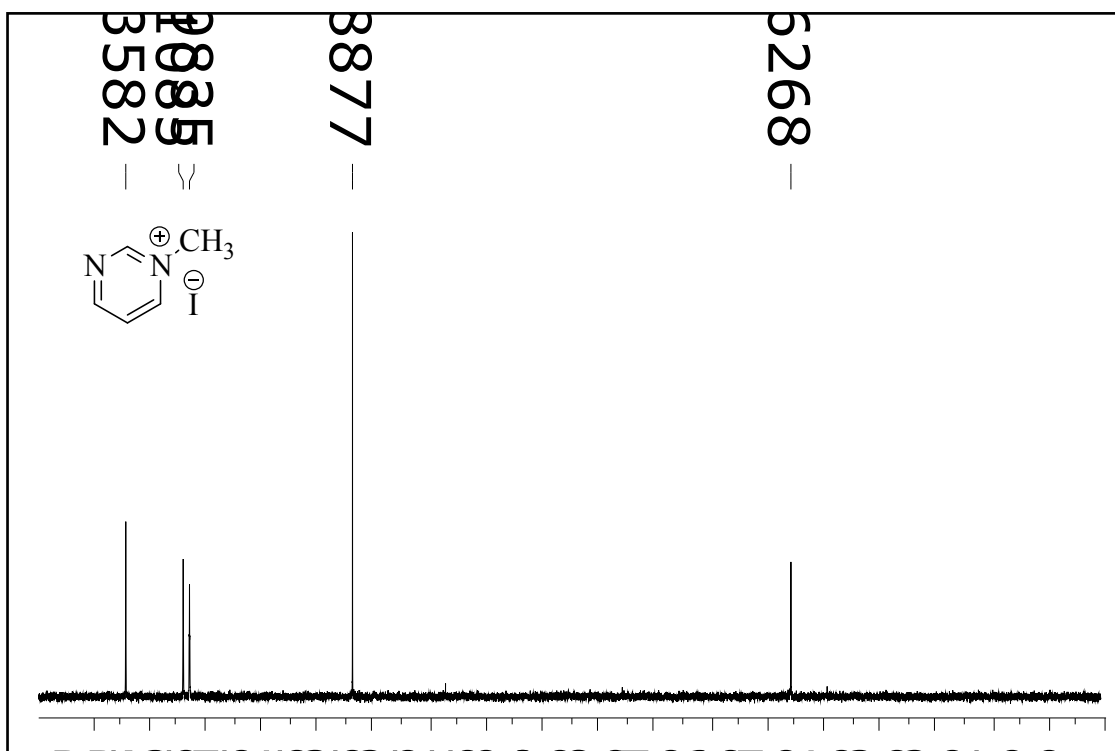

$^{13}\text{C}$  NMR spectrum of 1-methylpyrimidin-1-ium iodide (**2a**) in  $\text{D}_2\text{O}$  at 500 MHz

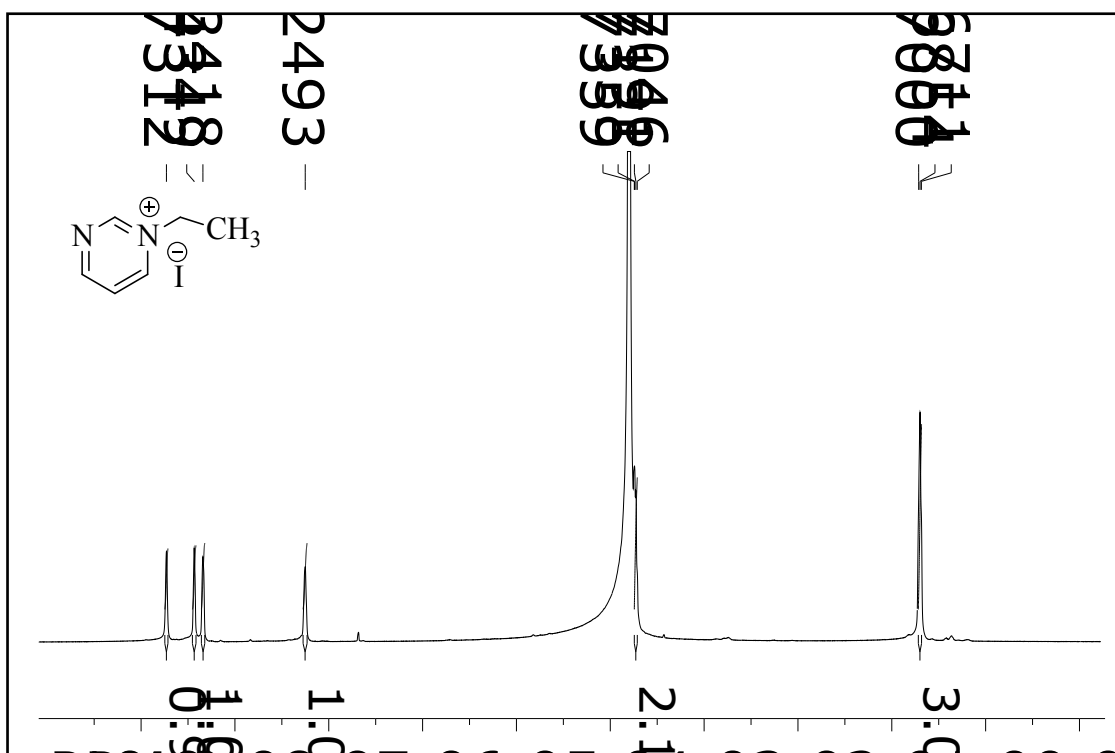

<sup>1</sup>H NMR spectrum of 1-ethylpyrimidin-1-ium iodide (**2b**) in D<sub>2</sub>O at 500 MHz

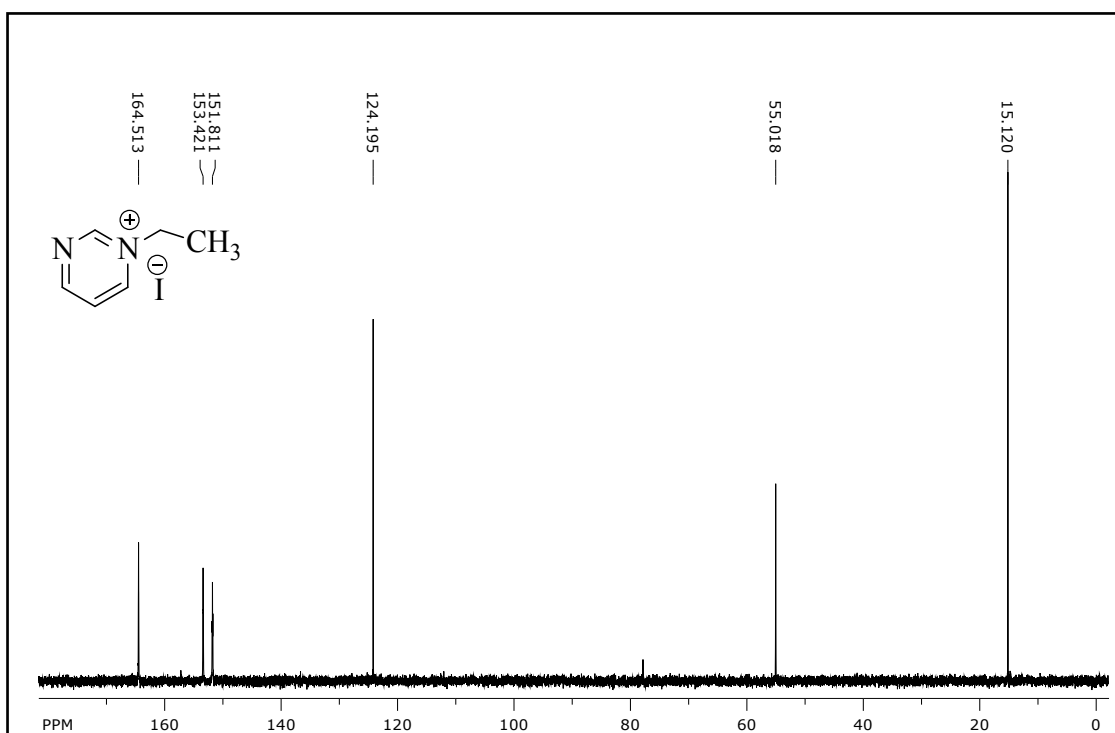

<sup>13</sup>C NMR spectrum of 1-ethylpyrimidin-1-ium iodide (**2b**) in D<sub>2</sub>O at 500 MHz







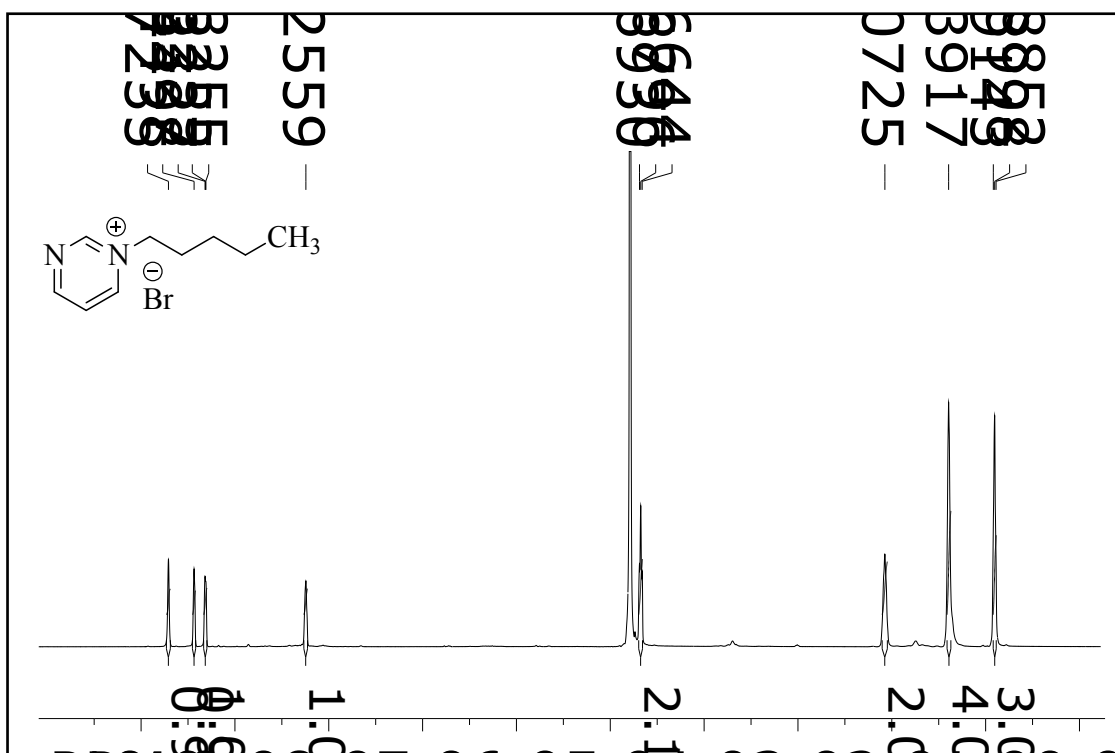

$^1\text{H}$  NMR spectrum of 1-pentylpyrimidin-1-ium bromide (**2e**) in  $\text{D}_2\text{O}$  at 500 MHz

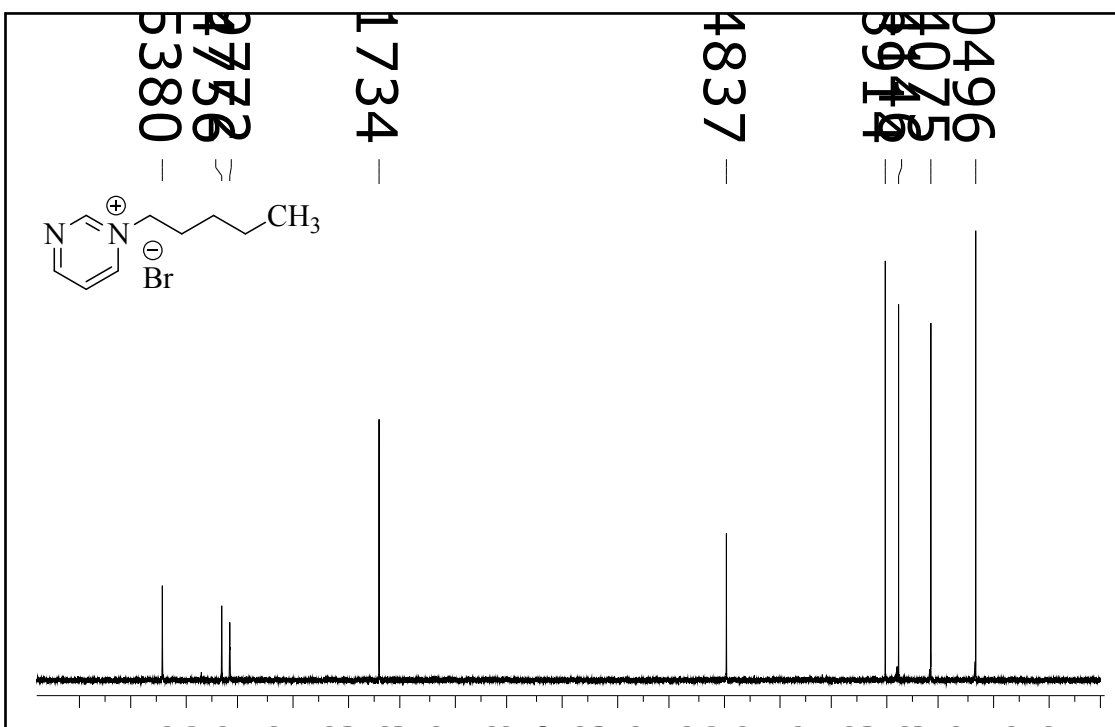

$^{13}\text{C}$  NMR spectrum of 1-pentylpyrimidin-1-ium bromide (**2e**) in  $\text{D}_2\text{O}$  at 500 MHz



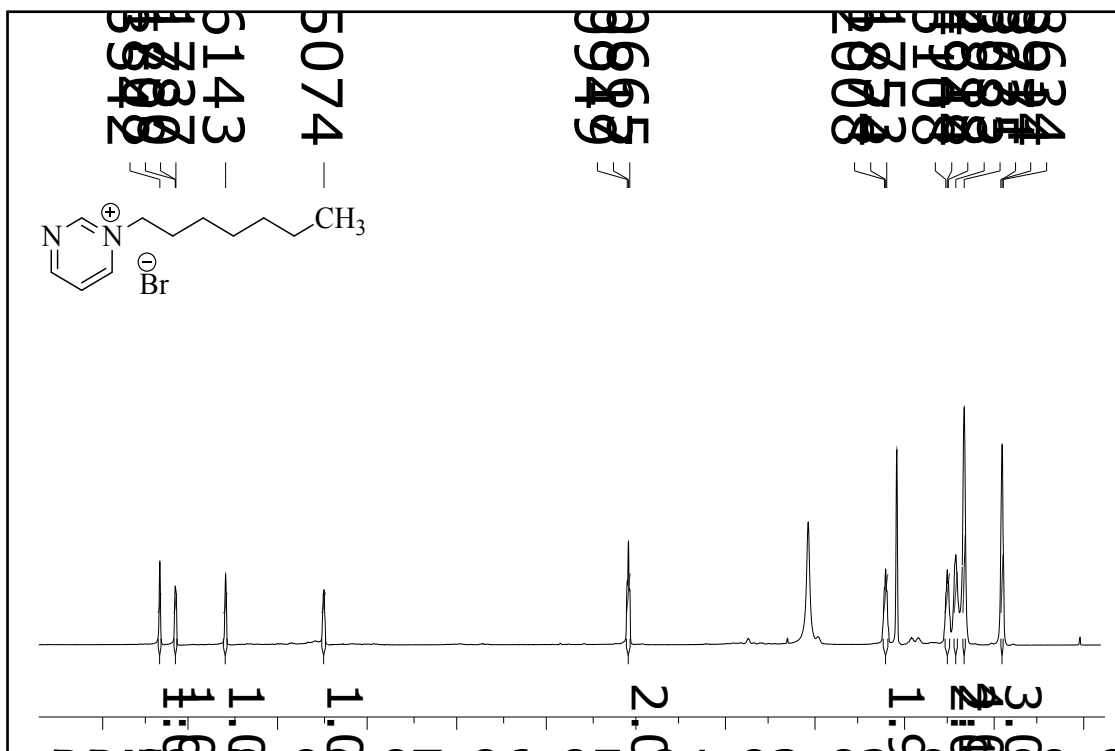

$^1\text{H}$  NMR spectrum of 1-heptylpyrimidin-1-ium bromide (**2g**) in acetone- $\text{d}_6$  at 500 MHz

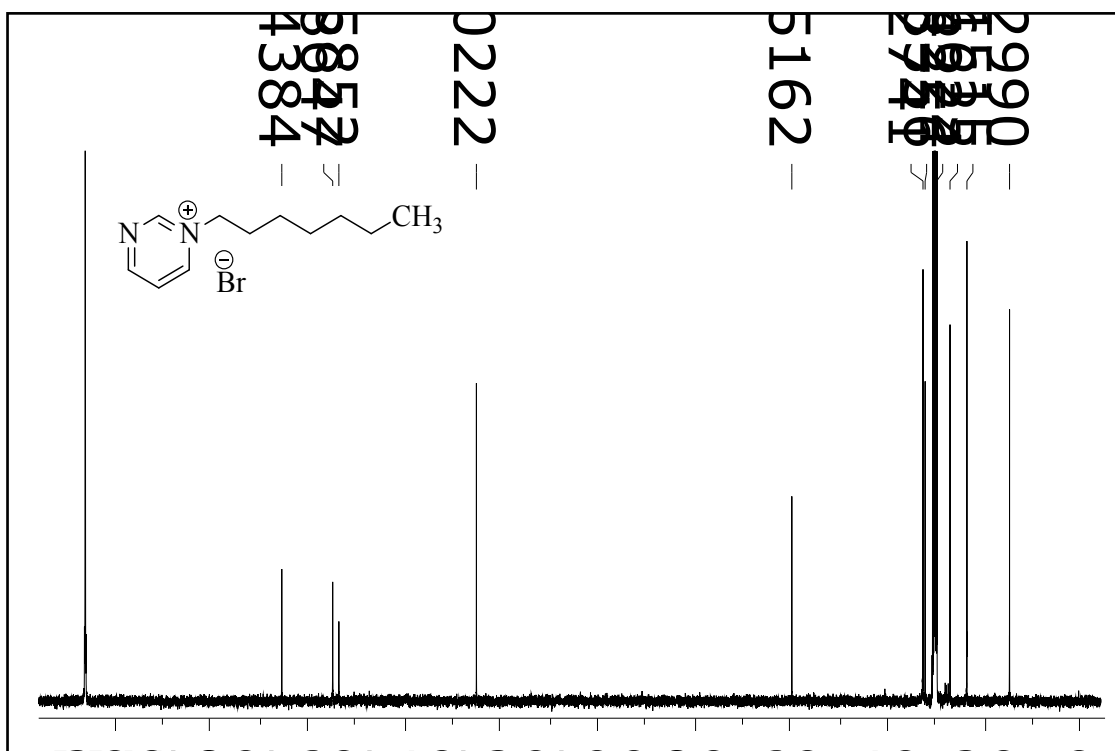

$^{13}\text{C}$  NMR spectrum of 1-heptylpyrimidin-1-ium bromide (**2g**) in acetone- $\text{d}_6$  at 500 MHz





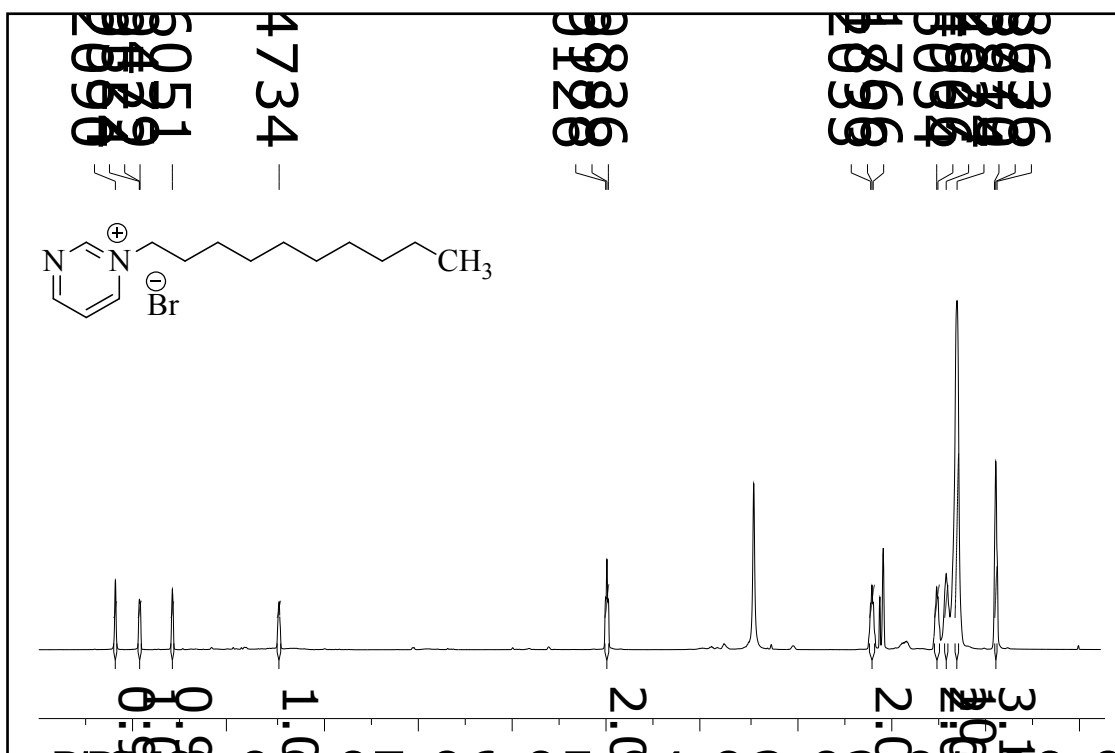

$^1\text{H}$  NMR spectrum of 1-decylpyrimidin-1-ium bromide (**2j**) in acetone- $\text{d}_6$ + $\text{CD}_3\text{OD}$  at 500 MHz

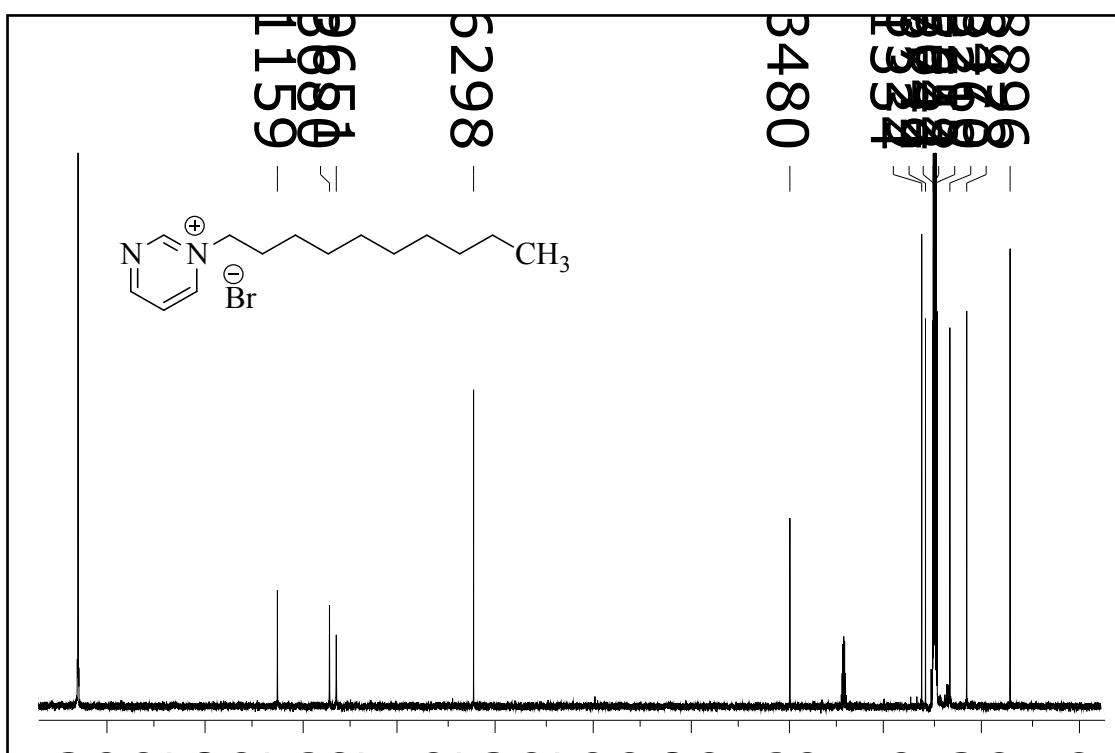

$^{13}\text{C}$  NMR spectrum of 1-decylpyrimidin-1-ium bromide (**2j**) in acetone- $\text{d}_6$ + $\text{CD}_3\text{OD}$  at 500 MHz



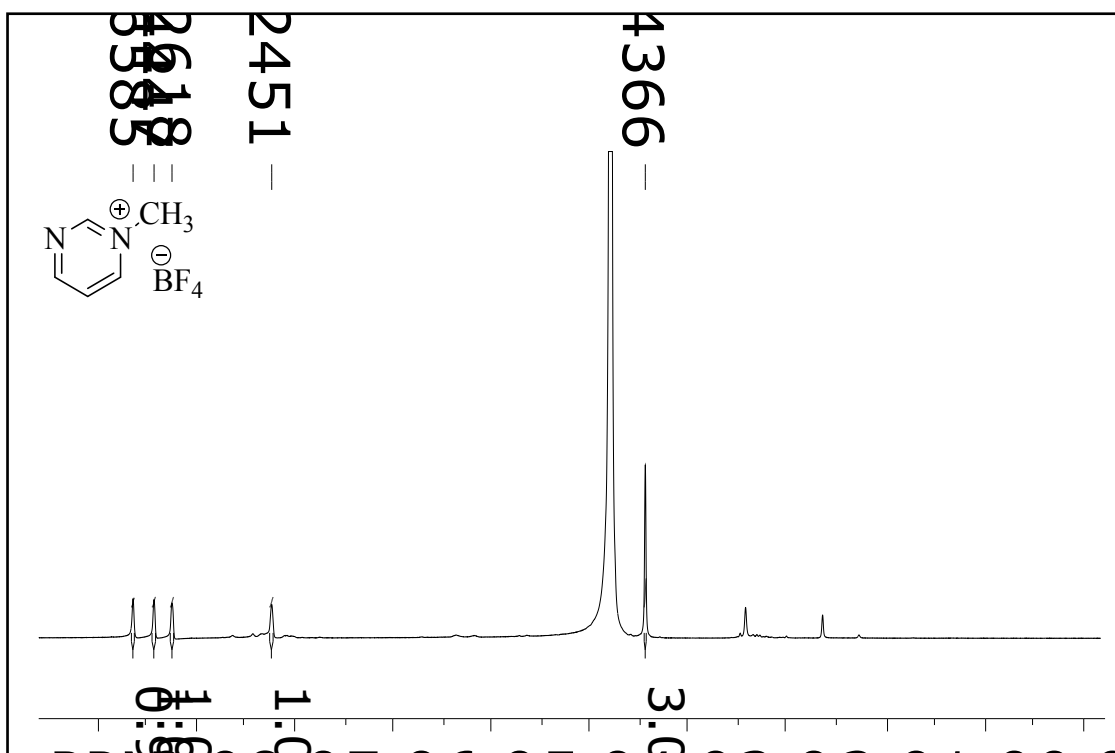

$^1\text{H}$  NMR spectrum of 1-methylpyrimidin-1-ium tetrafluoroborate (**3a**) in  $\text{D}_2\text{O}$  at 500 MHz

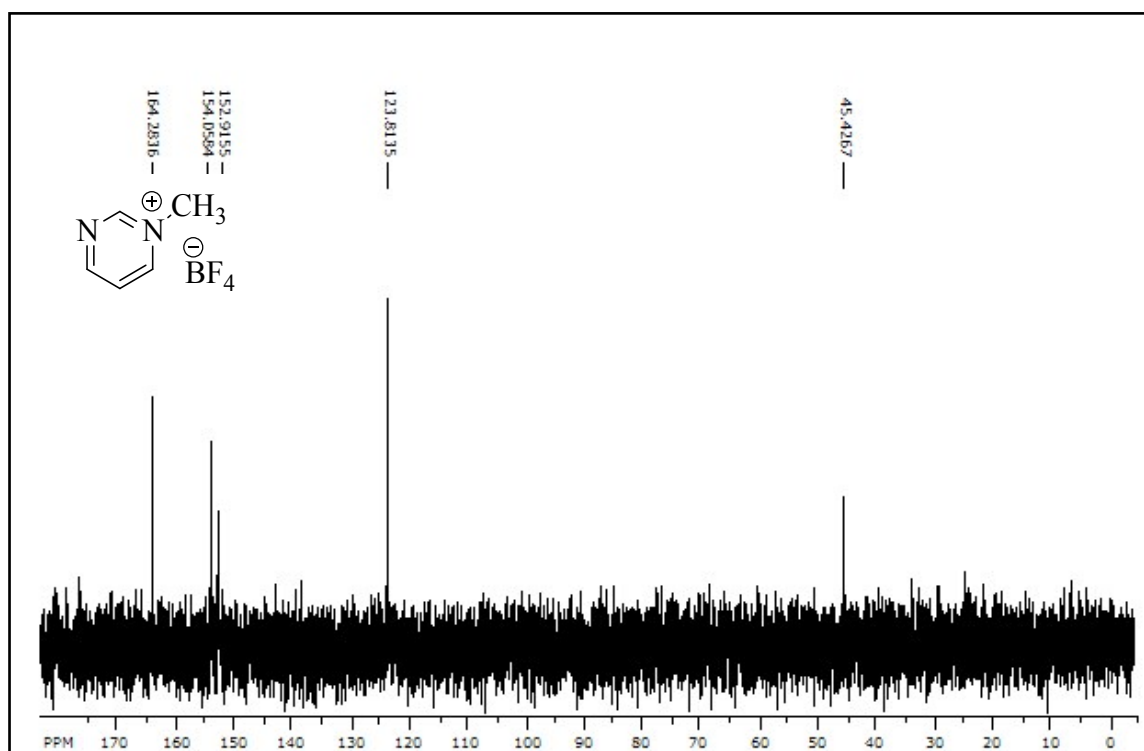

$^{13}\text{C}$  NMR spectrum of 1-methylpyrimidin-1-ium tetrafluoroborate (**3a**) in  $\text{D}_2\text{O}$  at 500 MHz



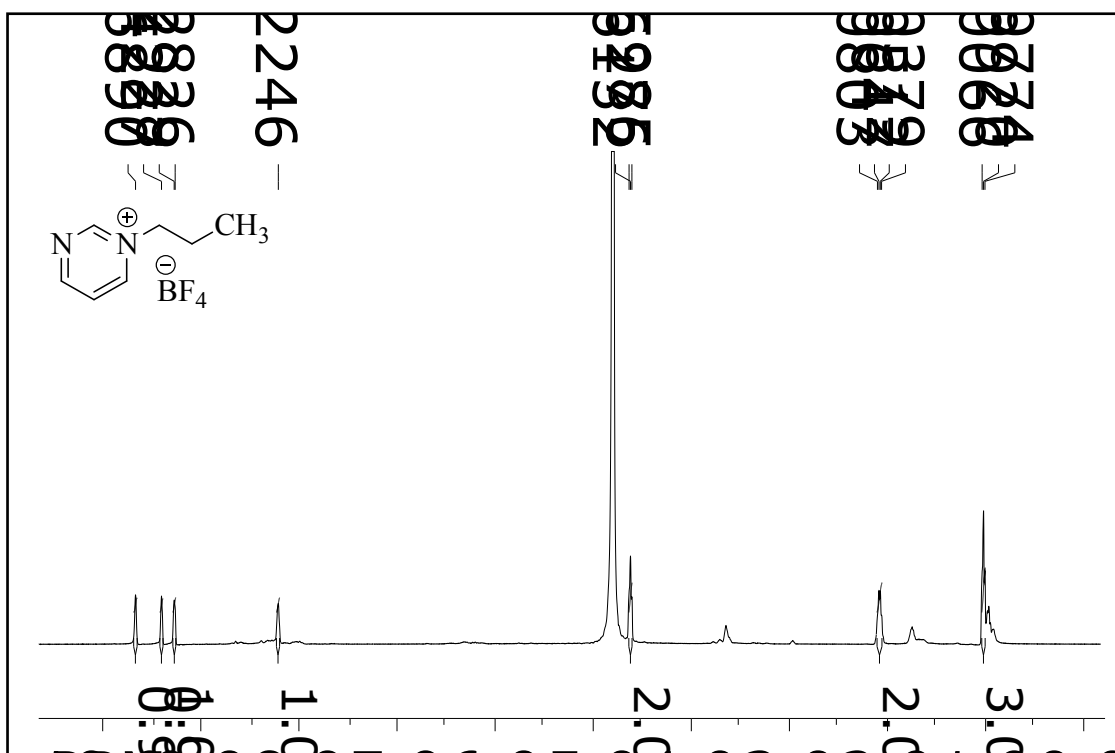

$^1\text{H}$  NMR spectrum of 1-propylpyrimidin-1-ium tetrafluoroborate (**3c**) in  $\text{D}_2\text{O}$  at 500 MHz

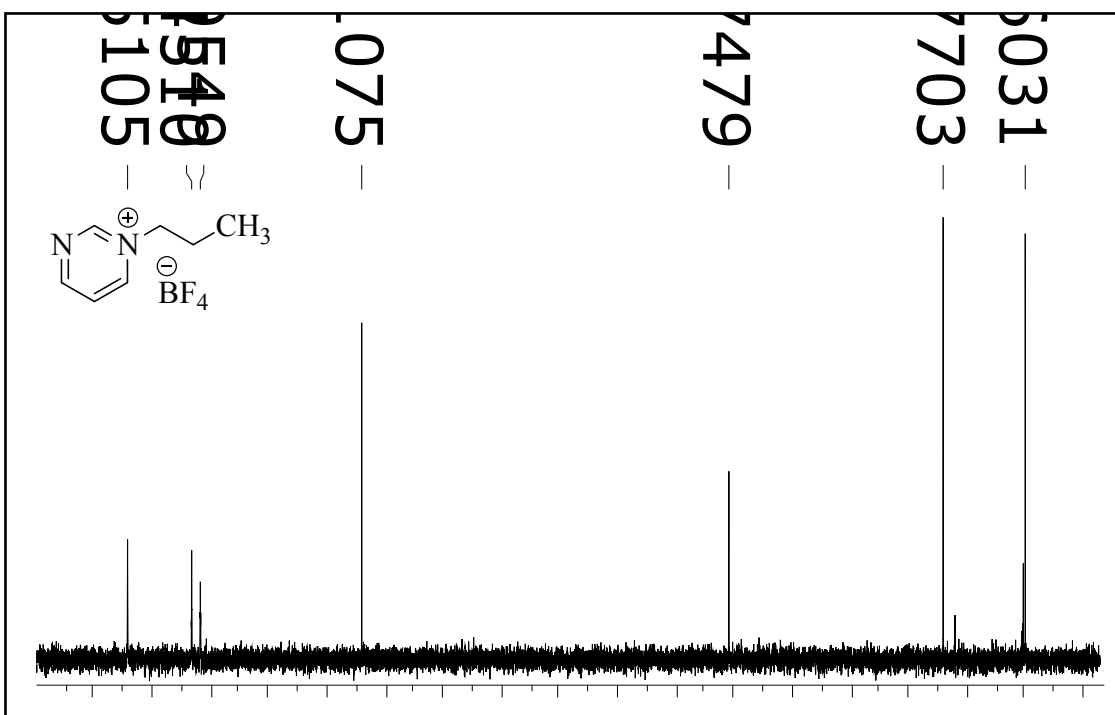

$^{13}\text{C}$  NMR spectrum of 1-propylpyrimidin-1-ium tetrafluoroborate (**3c**) in  $\text{D}_2\text{O}$  at 500 MHz



















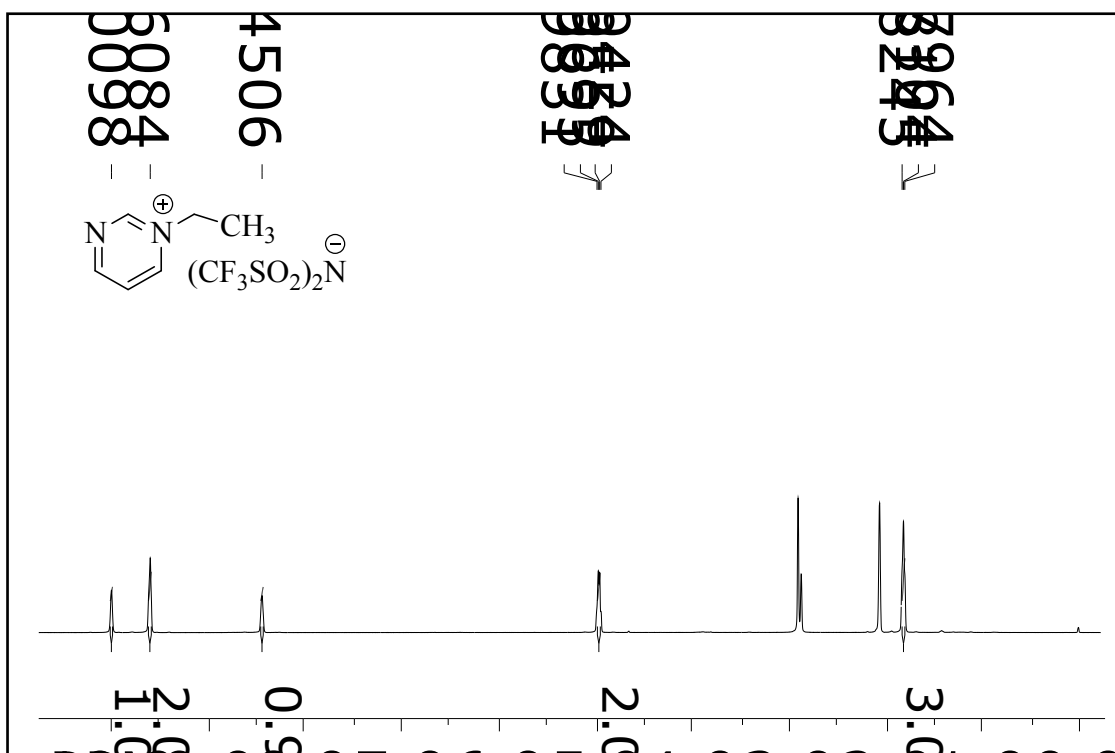

<sup>1</sup>H NMR spectra of 1-ethylpyrimidin-1-ium bis(trifluoromethanesulfonyl)amide (**4b**) in acetone-d<sub>6</sub> at 500 MHz

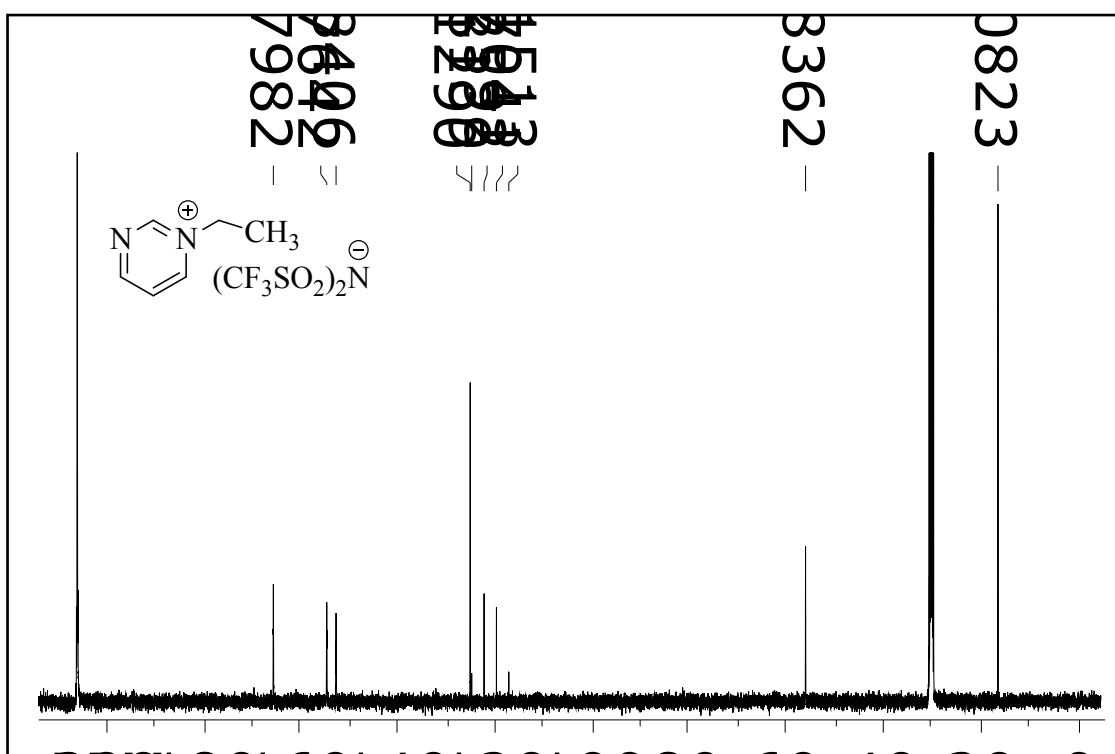

<sup>13</sup>C NMR spectrum of 1-ethylpyrimidin-1-ium bis(trifluoromethanesulfonyl)amide (**4b**) in acetone-d<sub>6</sub> at 500 MHz

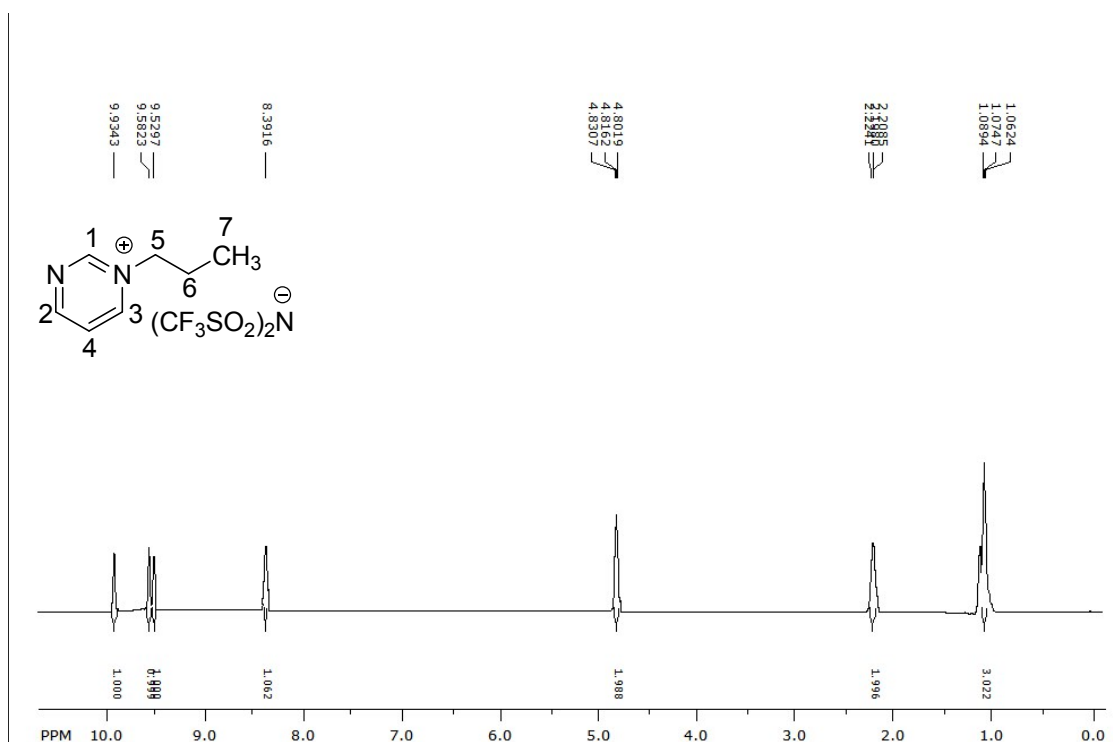

<sup>1</sup>H NMR spectrum of 1-propylpyrimidin-1-ium bis(trifluoromethanesulfonyl)amide (**4c**) in acetone-d<sub>6</sub> at 500 MHz

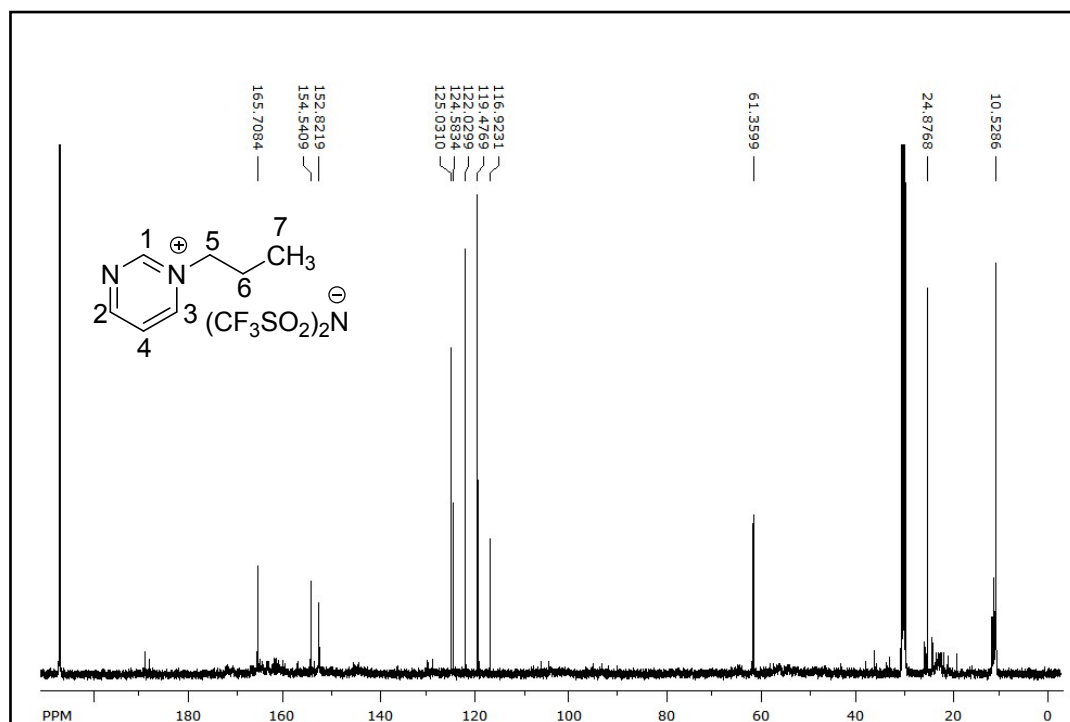

<sup>13</sup>C NMR spectrum of 1-propylpyrimidin-1-ium bis(trifluoromethanesulfonyl)amide (**4c**) in acetone-d<sub>6</sub> at 500 MHz



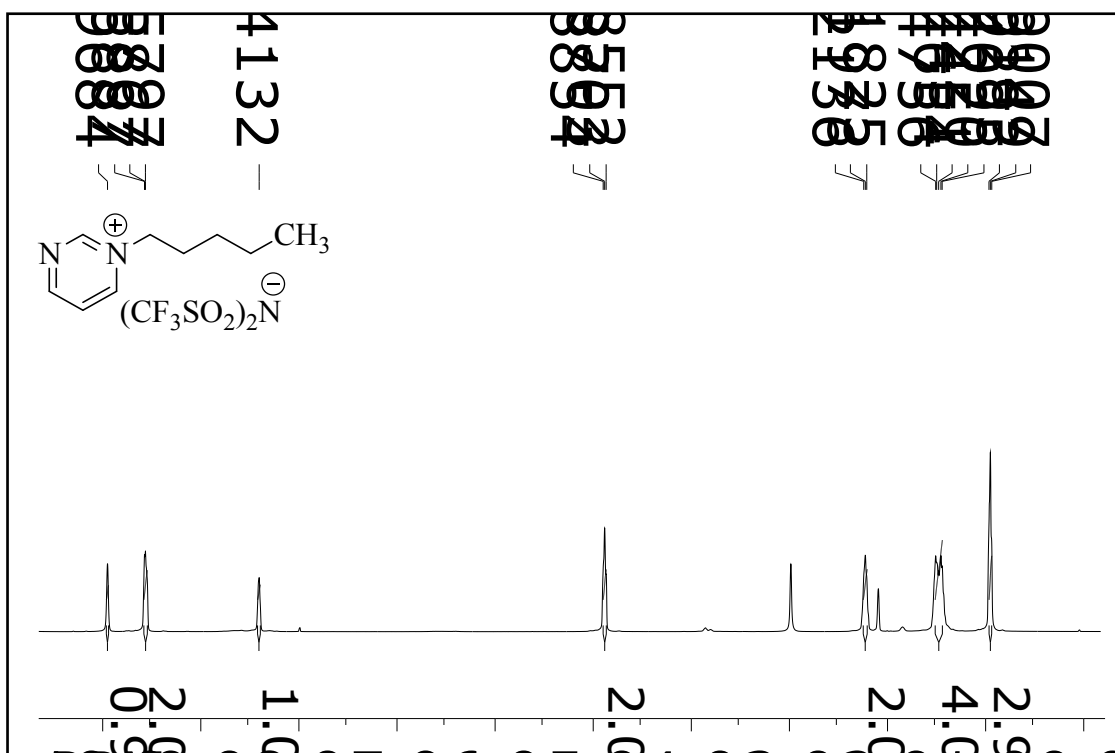

<sup>1</sup>H NMR spectrum of 1-pentylpyrimidin-1-ium bis(trifluoromethanesulfonyl)amide (**4e**) in acetone-d<sub>6</sub> at 500 MHz

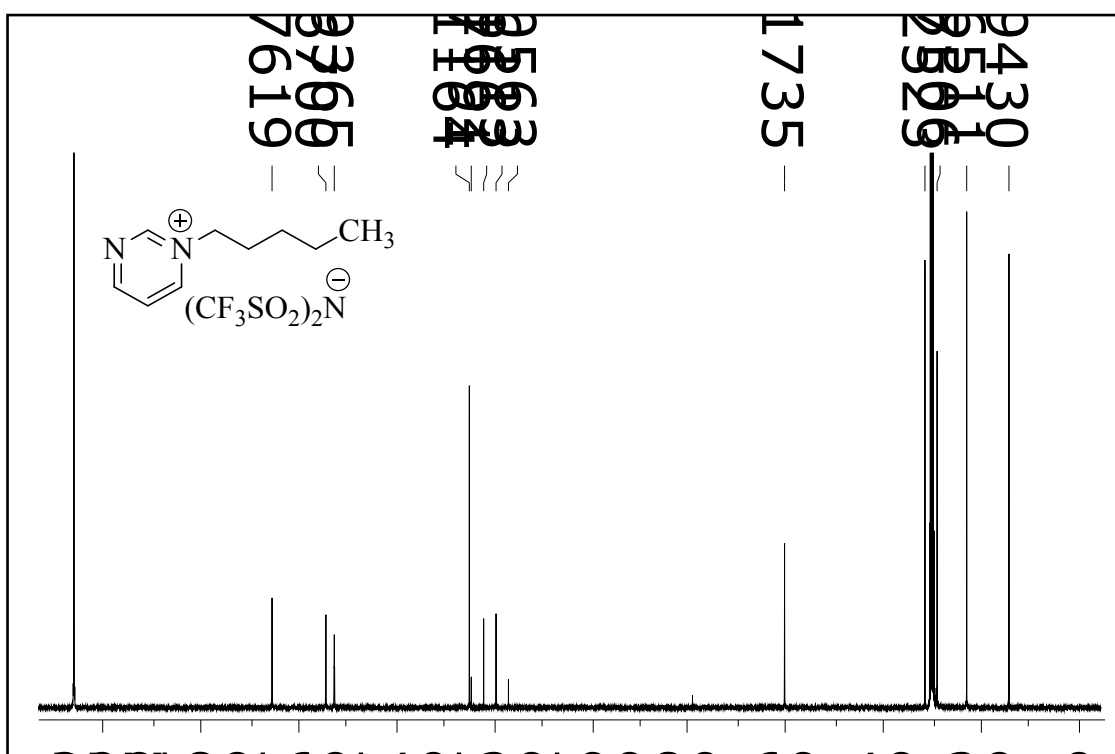





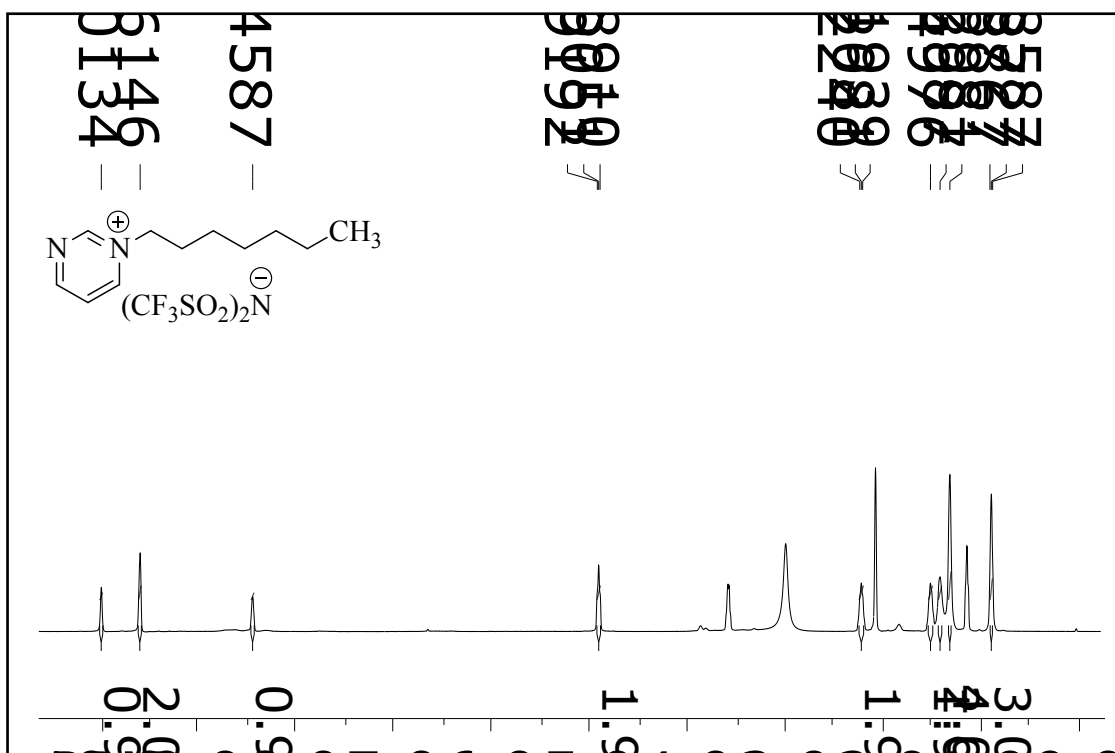

$^1\text{H}$  NMR spectrum of 1-heptylpyrimidin-1-ium bis(trifluoromethanesulfonyl)amide (**4g**) in acetone- $\text{d}_6$  at 500 MHz

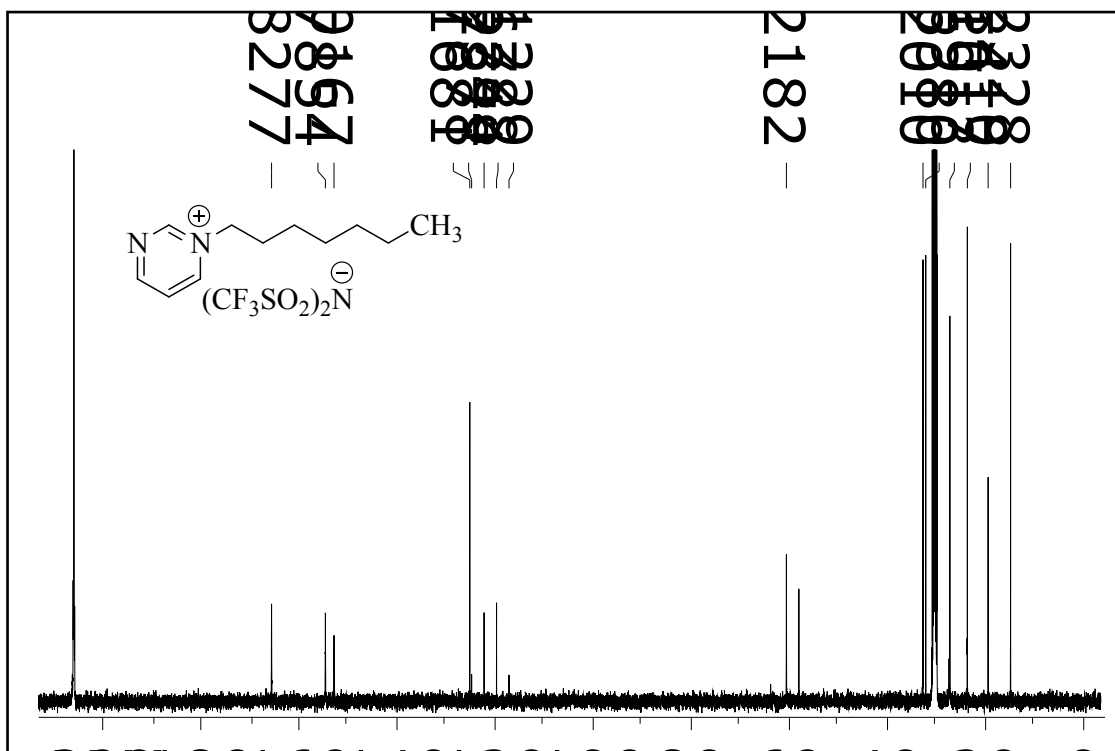

$^{13}\text{C}$  NMR spectrum of 1-heptylpyrimidin-1-ium bis(trifluoromethanesulfonyl)amide (**4g**) in acetone- $\text{d}_6$  at 500 MHz



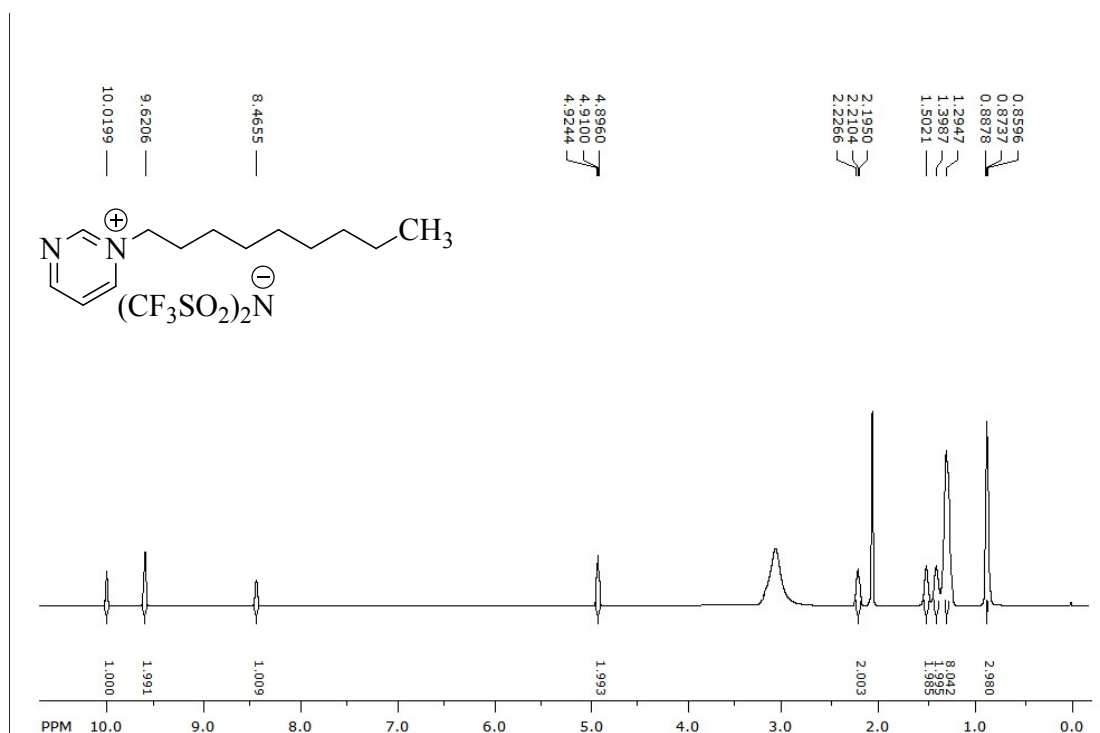

$^1\text{H}$  NMR spectrum of 1-nonylpyrimidin-1-ium bis(trifluoromethanesulfonyl)amide (**4i**) in acetone- $\text{d}_6$  at 500 MHz

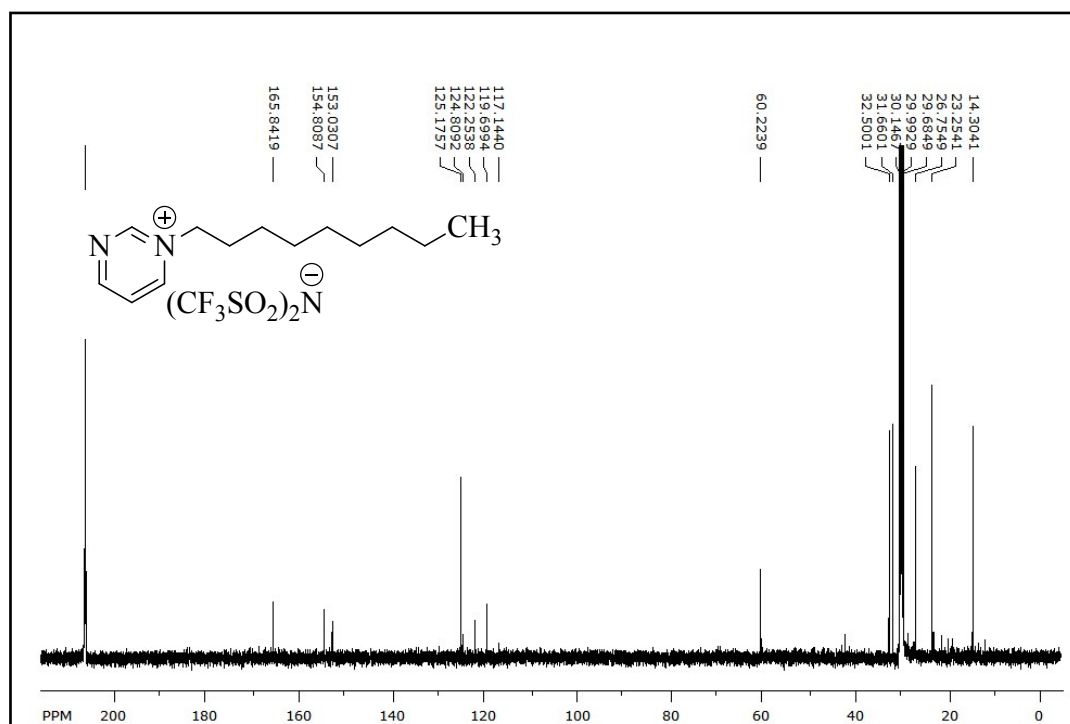

$^{13}\text{C}$  NMR spectrum of 1-nonylpyrimidin-1-ium bis(trifluoromethanesulfonyl)amide (**4i**) in acetone- $\text{d}_6$  at 500 MHz

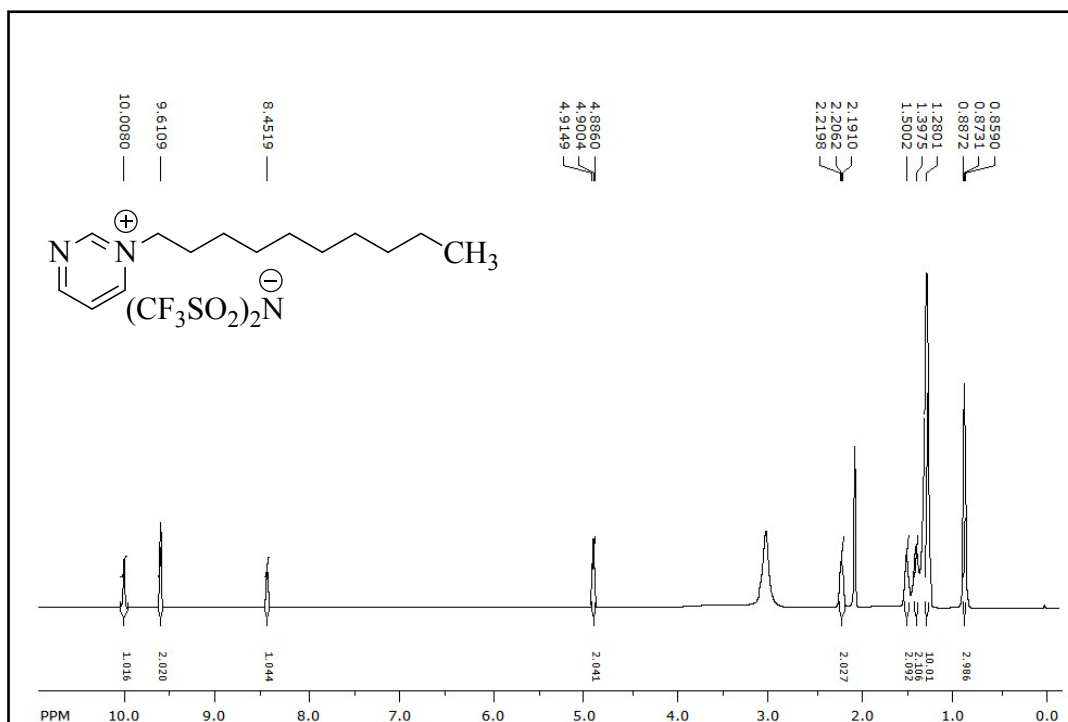

$^1\text{H}$  NMR spectrum of 1-decylpyrimidin-1-ium bis(trifluoromethanesulfonyl)amide (**4j**) in acetone- $\text{d}_6$  at 500 MHz

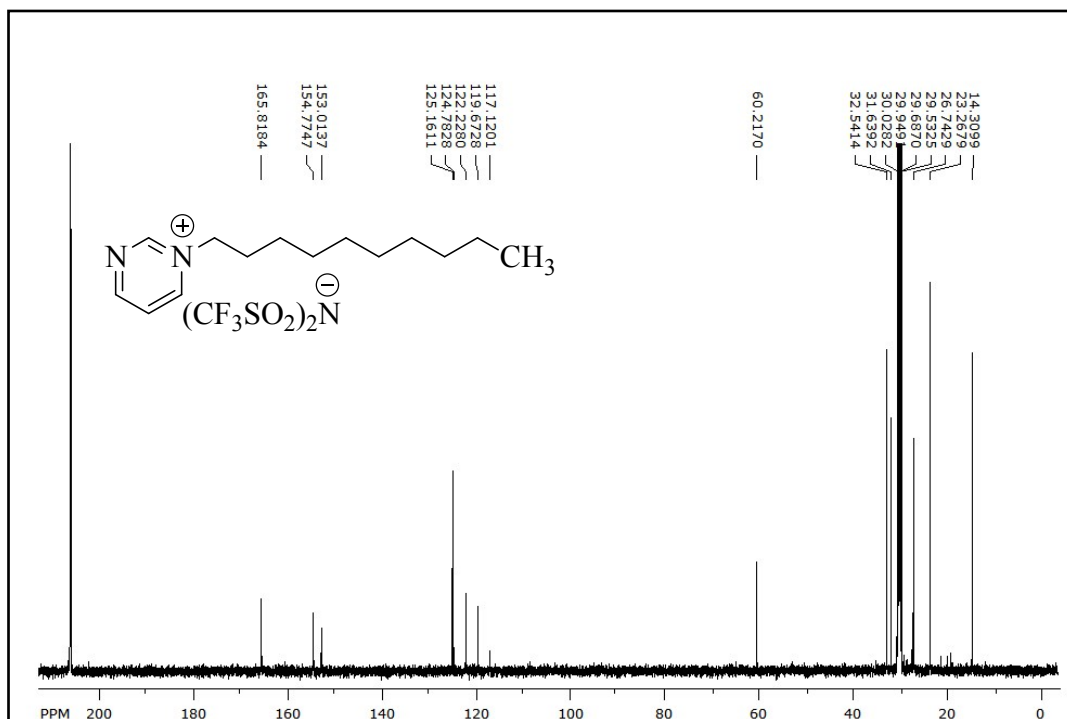

$^{13}\text{C}$  NMR spectrum of 1-decylpyrimidin-1-ium bis(trifluoromethanesulfonyl)amide (**4j**) in acetone- $\text{d}_6$  at 500 MHz

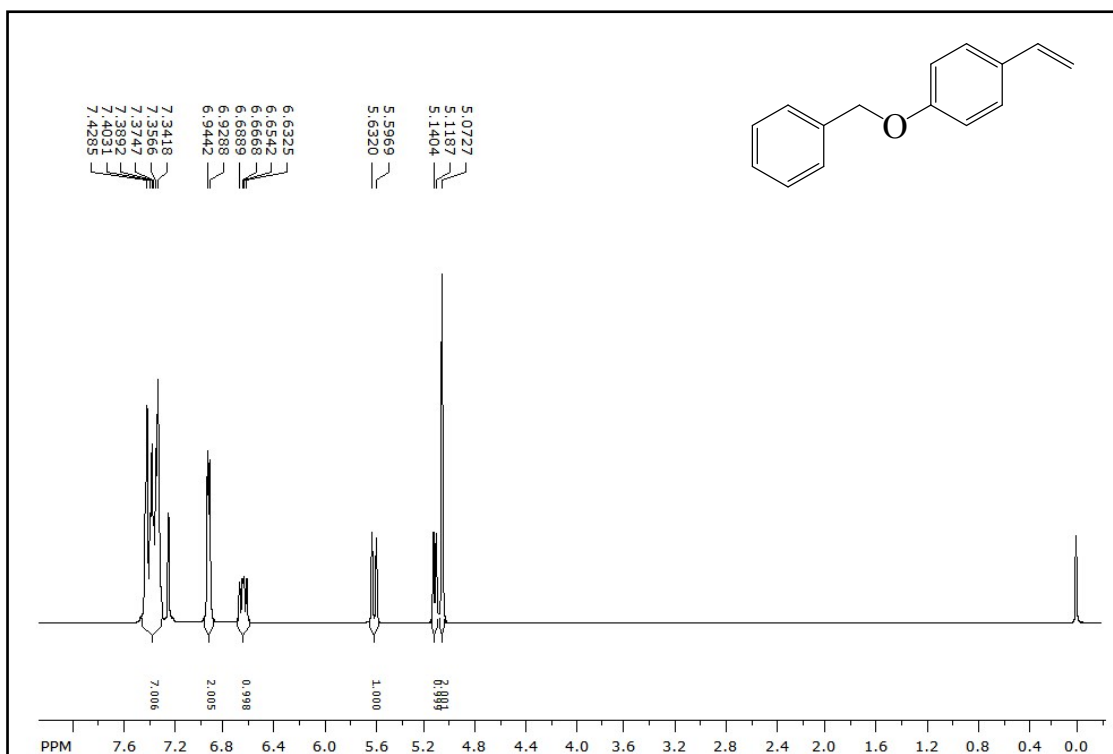

$^1\text{H}$  NMR spectrum of 1-(benzyloxy)-4-vinylbenzene (**5**) in  $\text{CDCl}_3$  at 500 MHz

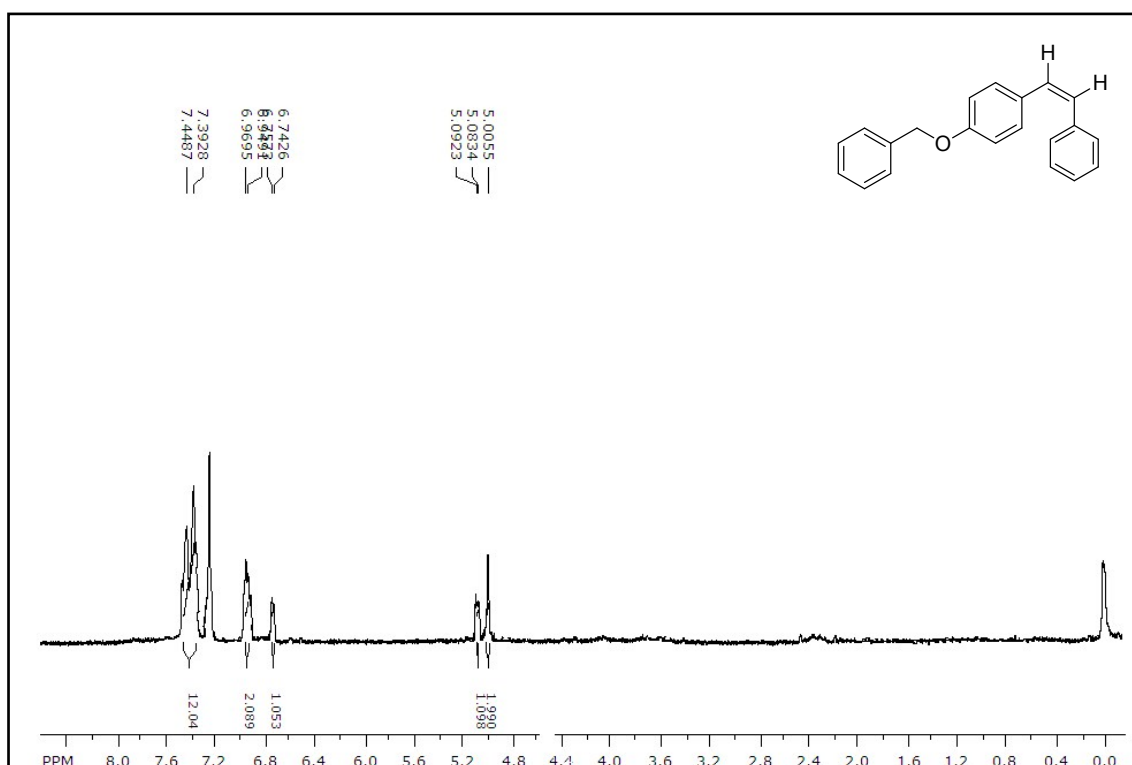

$^1\text{H}$  NMR spectrum of (*cis*)-1-(benzyloxy)-4-styrylbenzene (**7**) in  $\text{CDCl}_3$  at 500 MHz

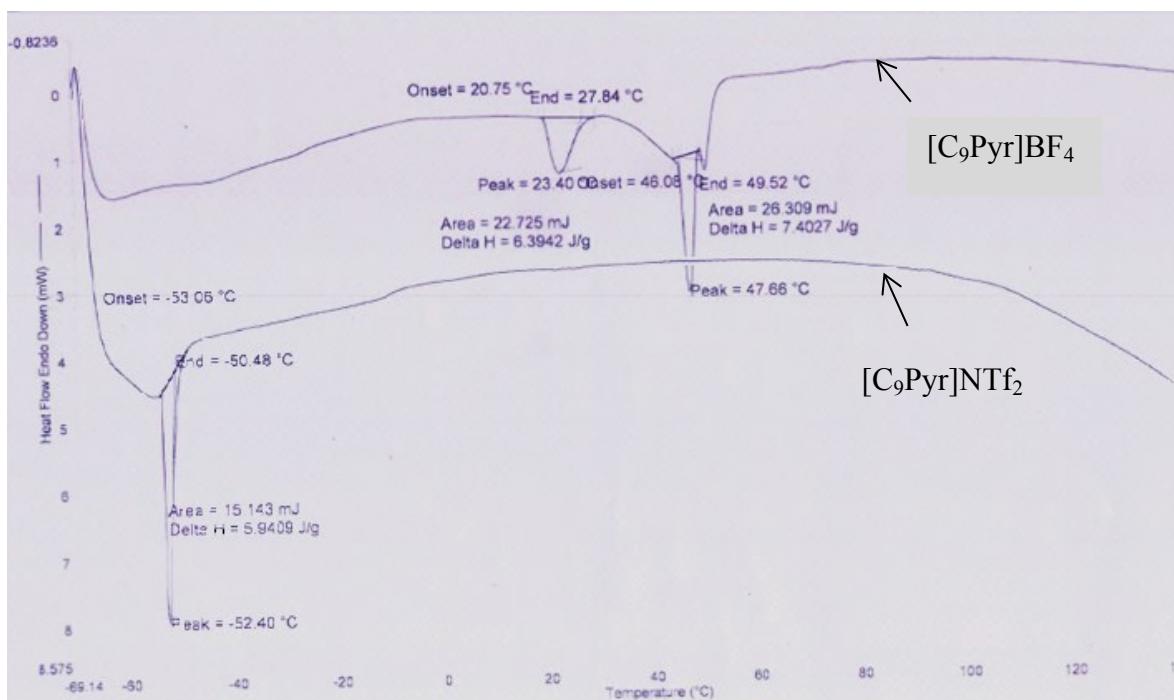

**Figure S1.** DSC plot of [C<sub>9</sub>Pyr]BF<sub>4</sub> and [C<sub>9</sub>Pyr]NTf<sub>2</sub> ionic liquid

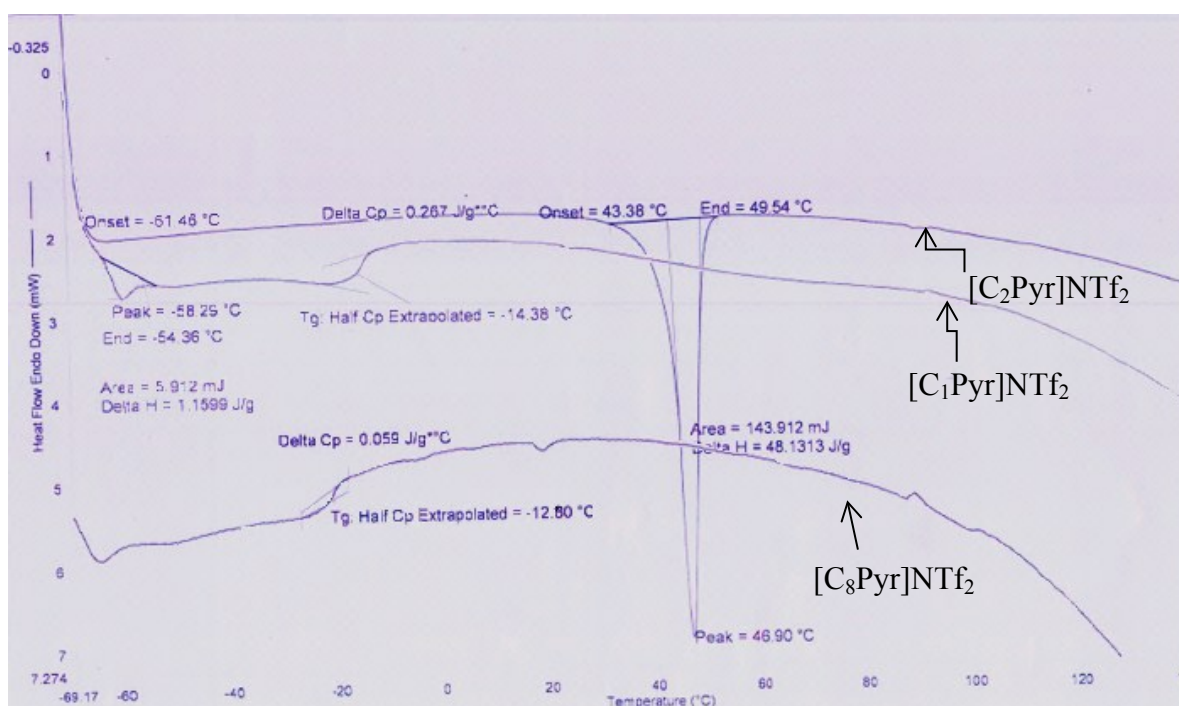

**Figure S2.** DSC plot of [C<sub>1</sub>Pyr]NTf<sub>2</sub>, [C<sub>2</sub>Pyr]NTf<sub>2</sub> and [C<sub>8</sub>Pyr]NTf<sub>2</sub> ionic liquid

| <b>Pyrimidinium ionic liquids</b>     | $\Delta H_m / \text{J}\cdot\text{g}^{-1}$ | $T_{\text{onset}} / ^\circ\text{C}$ | $T_{\text{peak}} / ^\circ\text{C}$<br>( $T_m$ ) | $T_{\text{endset}} / ^\circ\text{C}$ | $\Delta C_p / \text{J}\cdot\text{g}^{-1}\cdot^\circ\text{C}$ |
|---------------------------------------|-------------------------------------------|-------------------------------------|-------------------------------------------------|--------------------------------------|--------------------------------------------------------------|
| [C <sub>9</sub> Pyr]BF <sub>4</sub>   | 7.4027                                    | 46.08                               | 47.66                                           | 49.52                                | -                                                            |
| [C <sub>1</sub> Pyr]NTf <sub>2</sub>  | 1.1599                                    | -61.46                              | -58.29                                          | -54.36                               | 0.267                                                        |
| [C <sub>2</sub> Pyr] NTf <sub>2</sub> | 48.1313                                   | 43.38                               | 46.90                                           | 49.54                                | -                                                            |
| [C <sub>8</sub> Pyr] NTf <sub>2</sub> | -                                         | -                                   | -                                               | -                                    | 0.059                                                        |
| [C <sub>9</sub> Pyr] NTf <sub>2</sub> | 5.9409                                    | -53.06                              | -52.40                                          | -50.48                               | -                                                            |

**Table 1S.** Thermal properties of pyrimidinium ionic liquids
